# Supplementary material
Source: Springer Nature journal article supplement (https://www.springermedizin.de/resource/supplementary/12888_2012_1327_MOESM3_ESM.pdf/9479892)

A

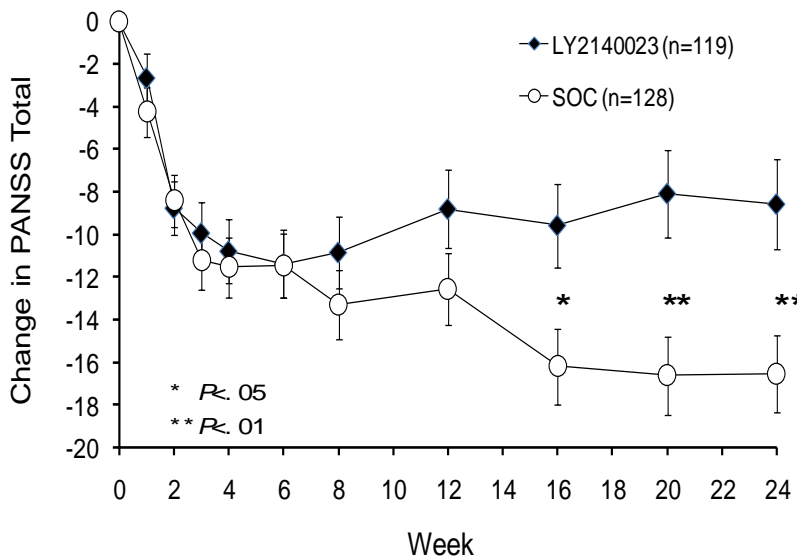

B

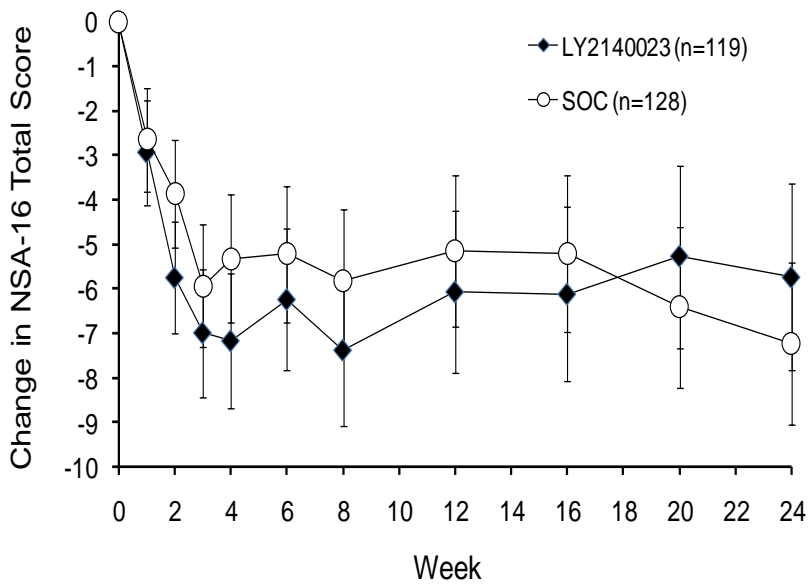

Supplement: MOESM3 [file 9479892]
